# Supplementary material for: Preparative Separation of Monoterpenoid Indole Alkaloid Epimers from Ervatamia yunnanensis Tsiang by pH-Zone-Refining Counter-Current Chromatography Combined with Preparative High-Performance Liquid Chromatography
Source: PubMed Central journal article supplement (PMC6480700; doi:10.3390/molecules24071316), 2019-04-03

Supplementary material for

**Preparative separation of monoterpenoid indole alkaloid  
epimers from *Ervatamia yunnanensis* Tsiang by  
pH-zone-refining counter-current chromatography  
combined with preparative high-performance liquid  
chromatography**

**Jie Zhou <sup>a,1</sup>, Si-Yu Du <sup>b,1</sup>, Hong-Jing Dong <sup>c</sup>, Lei Fang <sup>a,b,\*</sup>, Jin-Hong Feng <sup>c,\*</sup>**

<sup>a</sup> School of Biological Science and Technology, University of Jinan, Jinan 250022, China; zhoujie8761@163.com (J.Z.)

<sup>b</sup> Key laboratory of Natural Pharmaceutical Chemistry, Shandong University of Traditional Chinese Medicine, Jinan, 250200, China; dsy\_fine@163.com (S.D.)

<sup>c</sup> Shandong Key Laboratory of TCM Quality Control Technology, Shandong Analysis and Test Center, Qilu University of Technology (Shandong Academy of Sciences), Jinan 250014, China; donghongjing\_2006@163.com (H.D.)

\* Correspondence: fleiv@163.com (L.F.), Tel: 0086-531-89736799;  
fengjinhong520@163.com (J.F.), Tel: 0086-531- 68606193

<sup>1</sup>J. Zhou and S.Y. Du contributed equally to this article.

**Figure S1. ESIMS of compound 1**

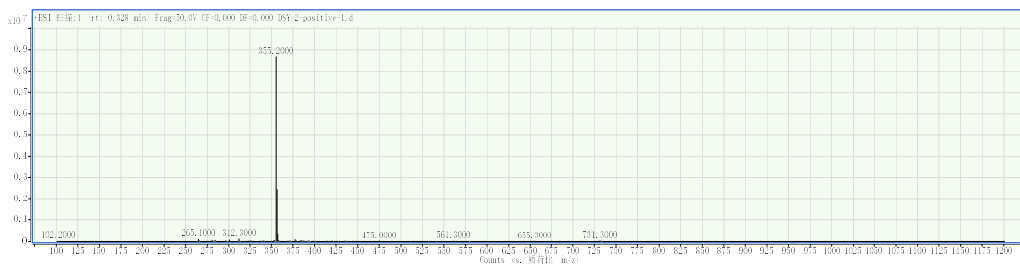

**Figure S2. <sup>1</sup>H NMR spectrum of compound 1 in CDCl<sub>3</sub> (600 MHz)**

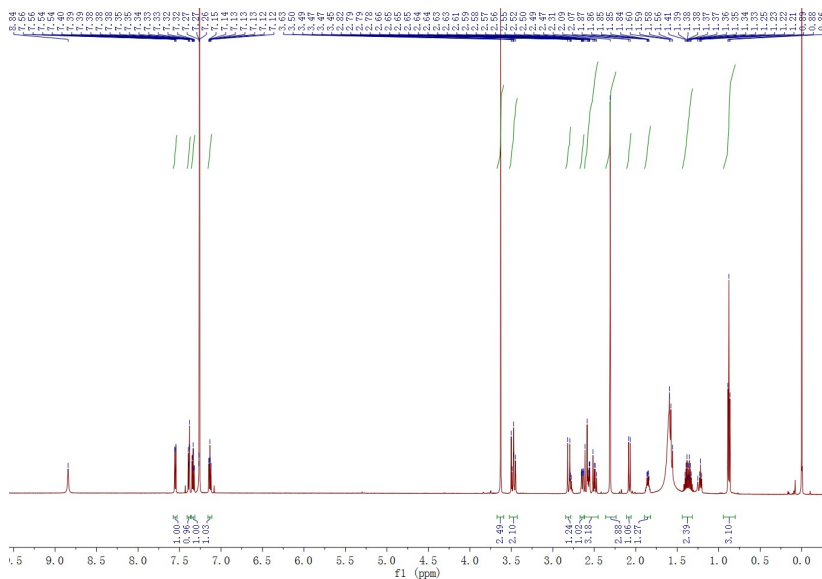

**Figure S3. <sup>13</sup>C NMR spectrum of compound 1 in CDCl<sub>3</sub> (150 MHz)**

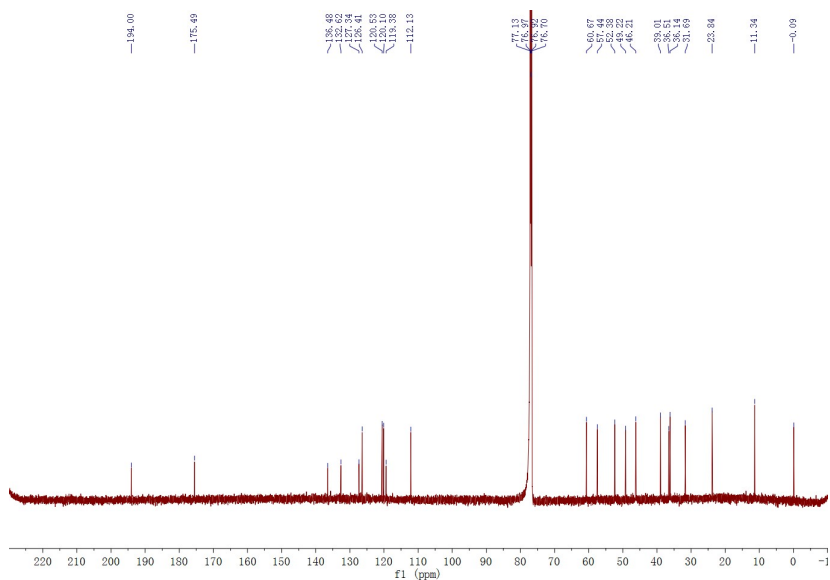

**Figure S4. ESIMS of compound 2**

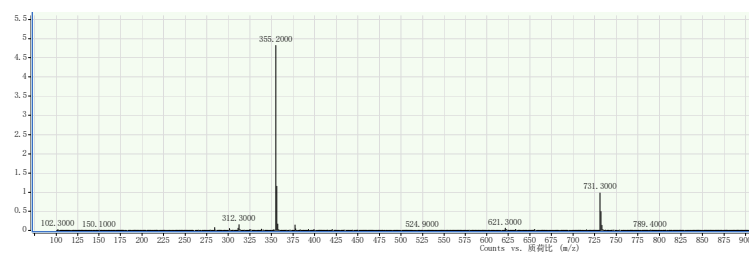

**Figure S5. <sup>1</sup>H NMR spectrum of compound 2 in CDCl<sub>3</sub> (600 MHz)**

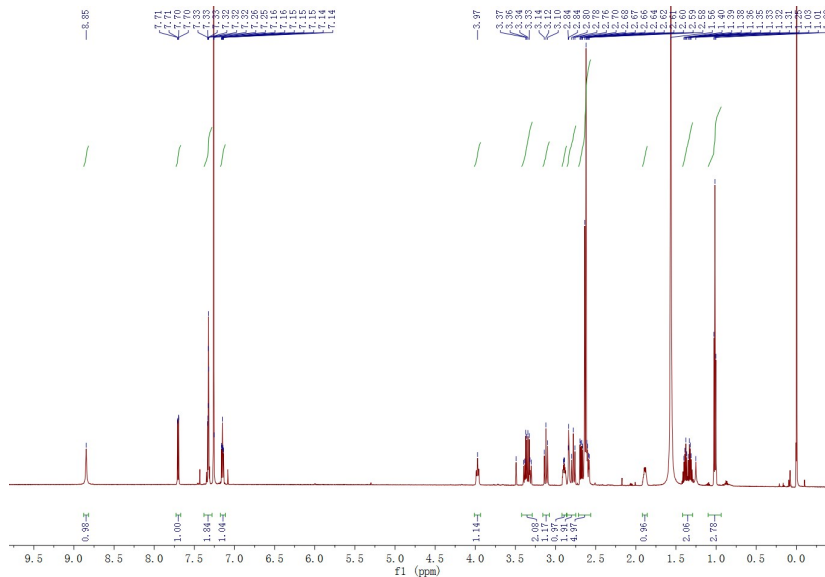

**Figure S6. <sup>13</sup>C NMR spectrum of compound 2 in CDCl<sub>3</sub> (150 MHz)**

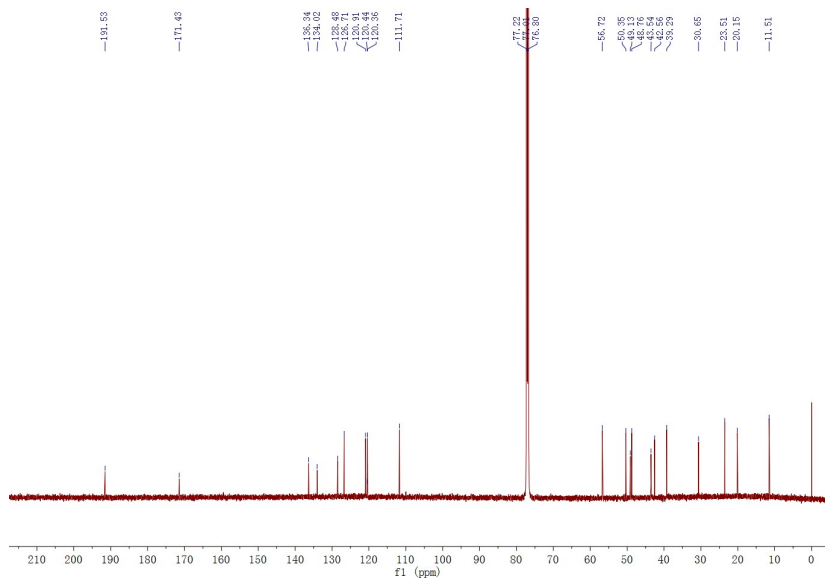



**Figure S10.** ESIMS of compound **4**

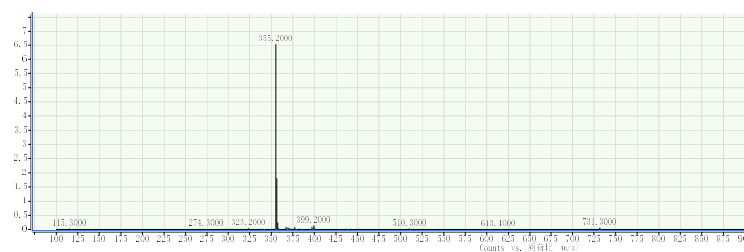

**Figure S11.**  $^1\text{H}$  NMR spectrum of compound **4** in  $\text{CDCl}_3$  (600 MHz)

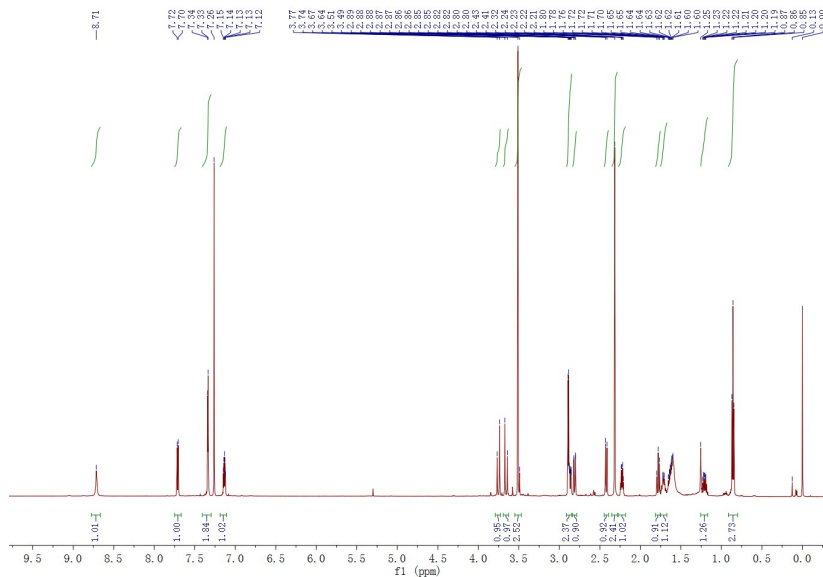

**Figure S12.**  $^{13}\text{C}$  NMR spectrum of compound **4** in  $\text{CDCl}_3$  (150 MHz)

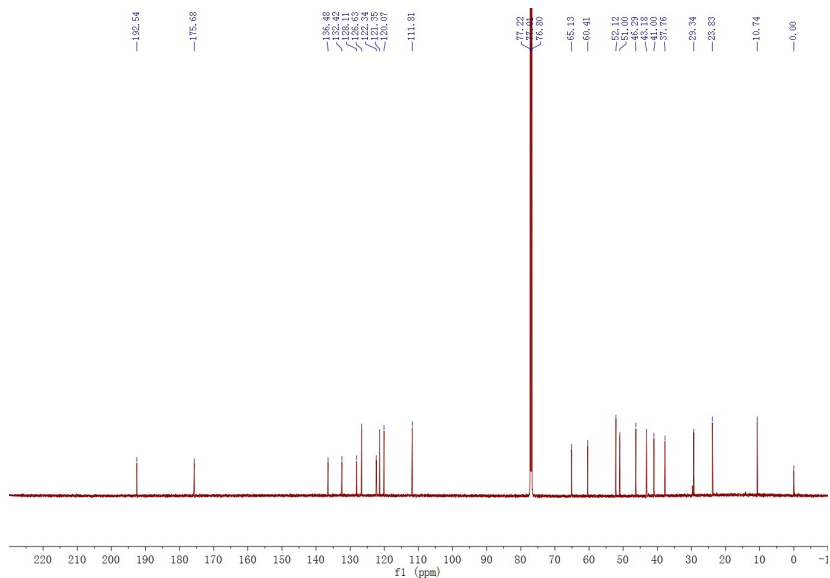

**Figure S13.** ESIMS of compound **5**

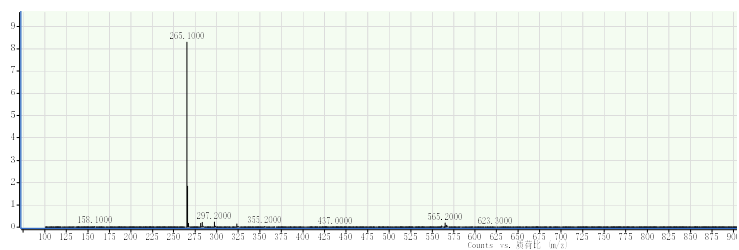

**Figure S14.**  $^1\text{H}$  NMR spectrum of compound **5** in  $\text{CDCl}_3$  (600 MHz)

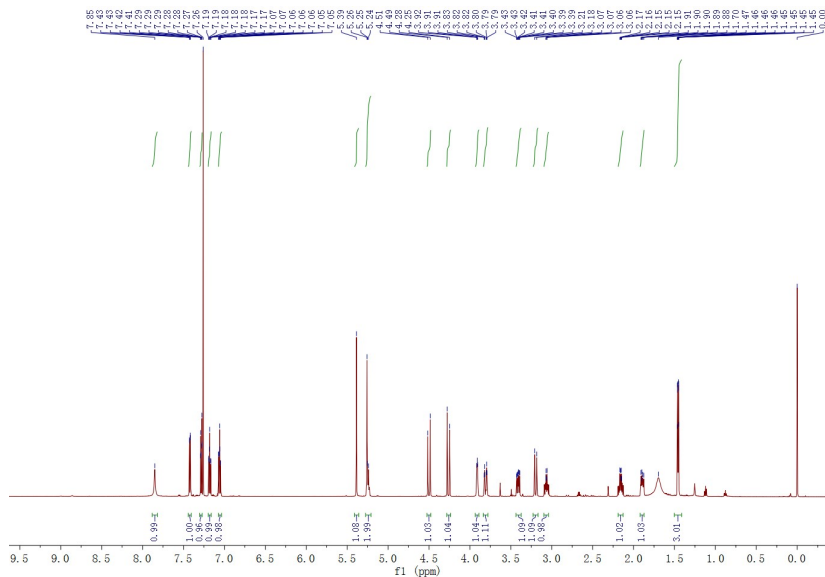

**Figure S15.**  $^{13}\text{C}$  NMR spectrum of compound **5** in  $\text{CDCl}_3$  (150 MHz)

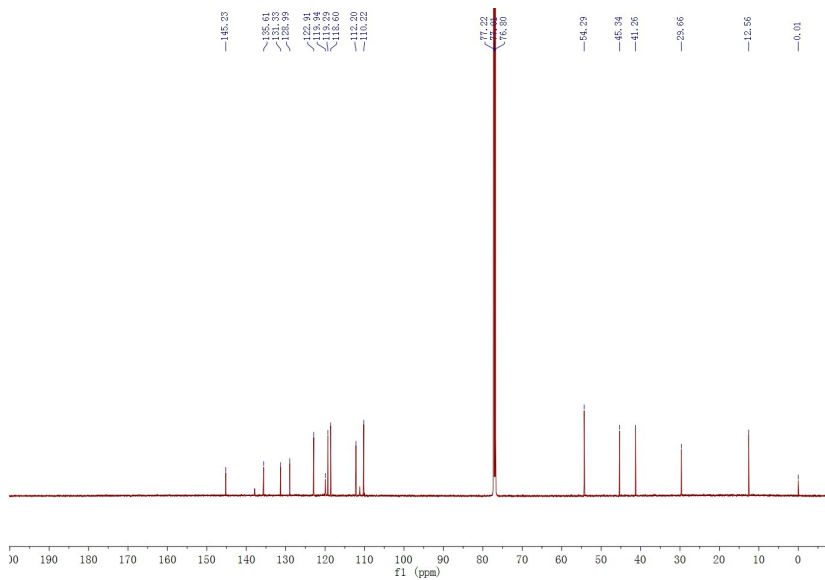

Supplement: molecules-24-01316-s001.pdf [file molecules-24-01316-s001.pdf]
